Title : LOCAL CEREBRAL BLOOD FLOW AND METABOLISM DURING HALOTHANE AND ENFLURANE  
 Authors : K.F. Ray, B.S., R.W. Kohlenberger, B.S., H.M. Shapiro, M.D.  
 Affiliation: Department of Anesthesia, Veterans Administration Hospital, San Diego  
 University of California, San Diego, La Jolla, California, 92093

**Introduction.** Heretofore, studies describing the relationship between cerebral blood flow (CBF) and metabolism (CMR) during anesthesia have been limited to considering the entire brain. This technical limitation may be considerable as the brain is known to be a heterogeneous organ insofar as structure and function are concerned. In the present study, we employed quantitative autoradiographic techniques to measure local CBF (1-CBF) and local glucose metabolism (1-CMRg) during anesthesia with 2 different volatile agents.

**Methods.** 1-CBF and 1-CMRg were respectively determined in rats with the  $^{14}\text{C}$ -iodoantipyrine and  $^{14}\text{C}$ -deoxyglucose methods in separate groups of rats ( $n=5-8$ ). Arterial blood gas status was the same in the awake controls and anesthetized rats. 1-CBF and 1-CMRg was determined in 25 structures; nine representative areas are reported herein.

**Results.** Table 1 summarizes our results. In anesthetized rats the arterial pressure fell between 33% to 55% while CBF remained unchanged. Therefore, the changes in 1-CMRg are the major cause of the 1-CBF/1-CMRg ratio changes shown in Figure 1.

**Discussion.** The average awake 1-CBF/1-CMRg ratio (CBF equivalent= $\text{CBF}_{\text{EQ}}$ ) reported in humans is about 10 and our value in awake rats ranges between 10 to 20. When anesthetic related hypotension remains uncorrected, marked differences in the  $\text{CBF}_{\text{EQ}}$  are apparent among rats anesthetized with halothane and enflurane. Thus, our study provides the first evidence that different volatile anesthetics cause differential relationships between CBF and CMR in various brain structures. While the general tendency appears to be an increase in the  $\text{CBF}_{\text{EQ}}$  during anesthesia with volatile agents (i.e., a "superflow state"), with enflurane the hippocampus  $\text{CBF}_{\text{EQ}}$  remains uniquely unchanged. This is apparent when contrasted with other structures during enflurane anesthesia as well as at 2 MAC of halothane. The low  $\text{CBF}_{\text{EQ}}$  in the hippocampus during enflurane is due to its elevated 1-CMRg which we have previously shown to be secondary to seizure activity localized in that structure. These findings suggest that substrate demand could potentially outstrip supply within the hippocampus during enflurane induced seizures. Further studies are required to answer this postulation.

TABLE 1

| STRUCTURE #        |      | AWAKE | 1 MAC |       | 2 MAC |       |
|--------------------|------|-------|-------|-------|-------|-------|
|                    |      |       | HALO. | ENFL. | HALO. | ENFL. |
| 1. Frontal Cortex. | CBF  | 256   | 209   | 165   | 237   | 214   |
|                    | CMRg | 13.2  | 13.3  | 8.5*  | 3.2*  | 8.1   |
| 2. Parietal Cortex | CBF  | 256   | 191   | 178   | 218   | 179   |
|                    | CMRg | 13.5  | 12.6  | 9.8   | 3.9*  | 7.3*  |
| 3. Visual Cortex   | CBF  | 243   | 187   | 146   | 209   | 162   |
|                    | CMRg | 12.3  | 13.2  | 8.2   | 3.0*  | 6.4   |
| 4. Basal Ganglia   | CBF  | 183   | 191   | 181   | 244   | 169   |
|                    | CMRg | 13.0  | 15.7  | 10.2  | 4.3*  | 7.7   |
| 5. Medial Thalamus | CBF  | 207   | 139   | 140   | 202   | 243   |
|                    | CMRg | 13.8  | 12.2  | 7.7*  | 4.6*  | 8.8   |
| 6. Hypothalamus    | CBF  | 130   | 126   | 149   | 148   | 187   |
|                    | CMRg | 9.0   | 9.2   | 6.3   | 2.4*  | 5.8   |
| 7. Hippocampus     | CBF  | 135   | 103   | 143   | 145   | 140   |
|                    | CMRg | 10.1  | 11.6  | 12.4  | 2.9*  | 12.9  |
| 8. Reticular Form  | CBF  | 182   | 133   | 207   | 210   | 242   |
|                    | CMRg | 10.1  | 10.5* | 7.1   | 2.3*  | 5.4   |
| 9. Inferior Collic | CBF  | 502   | 253   | 394   | 391   | 636   |
|                    | CMRg | 26.2  | 15.2  | 10.1* | 5.5*  | 8.0*  |

1-CBF (ml/100g/min) and 1-CMRg (mg/100g/min) in nine selected structures. Mean values are reported with significance ( $p < .01$ ) by an asterisk.

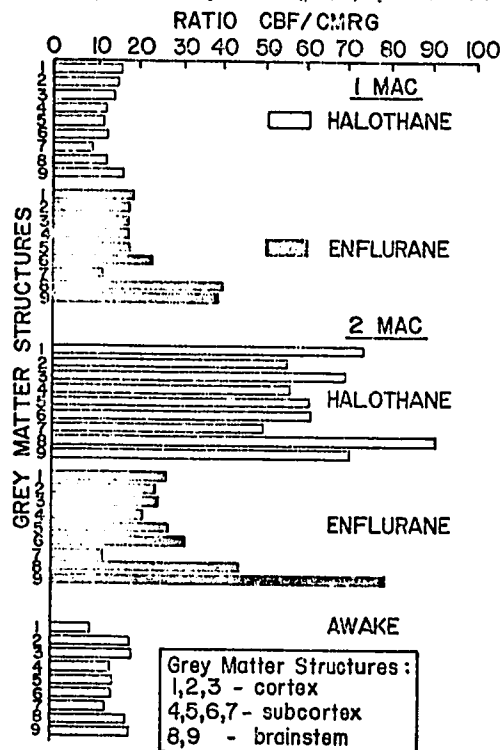

Source: https://asa2.silverchair.com/anesthesiology/article-pdf/51/3/S11/624643/0000542-197909001-00010.pdf
